# Supplementary material for: Immunization with a multi-antigen targeted DNA vaccine eliminates chemoresistant pancreatic cancer by disrupting tumor-stromal cell crosstalk
Source: PubMed Central journal article supplement (PMC10561406; doi:10.1186/s12967-023-04519-3), 2023-10-09

**A**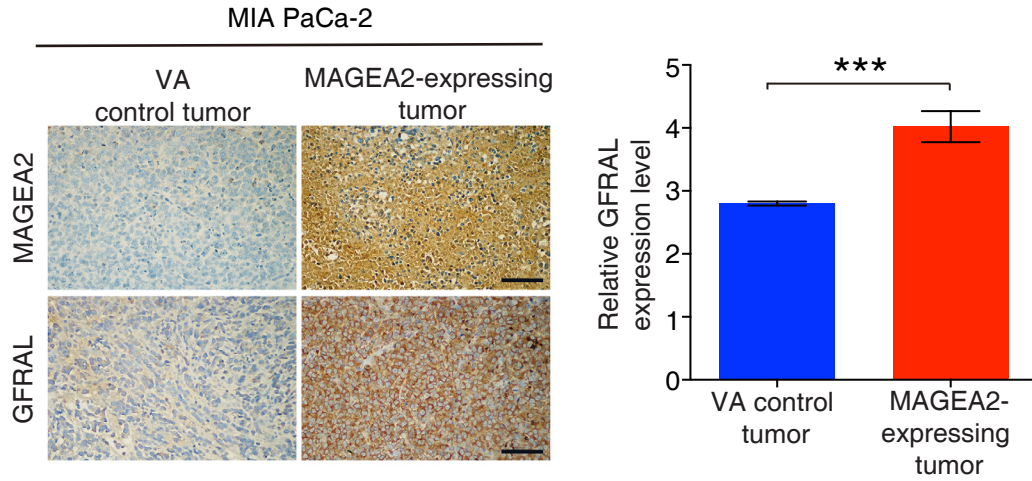**B**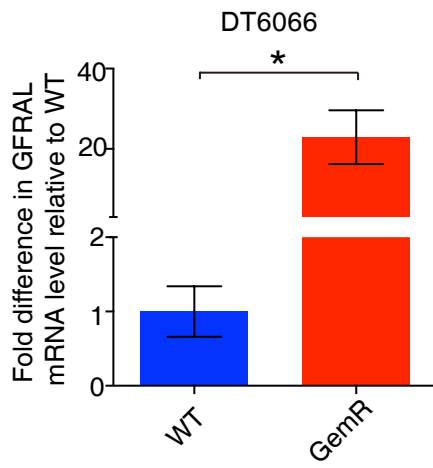**C**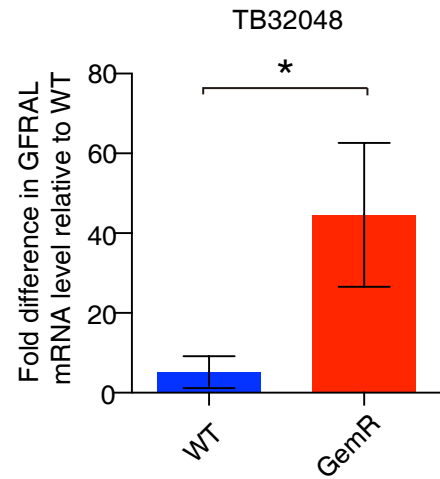**D**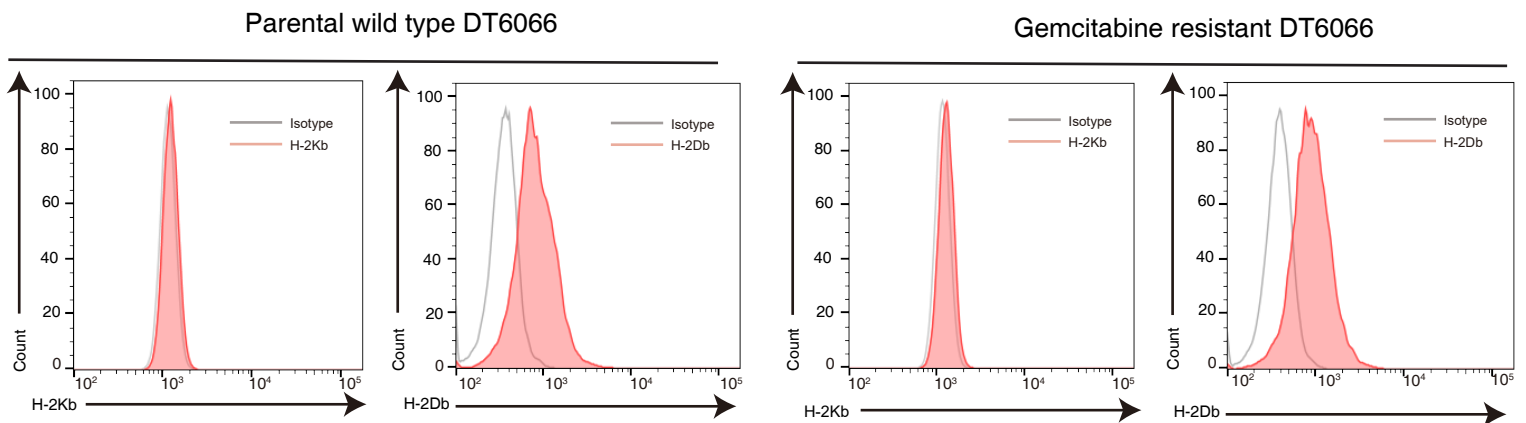

Supplement: 12967_2023_4519_MOESM6_ESM.pdf [file 12967_2023_4519_MOESM6_ESM.pdf]
